# Supplementary material
Source: PubMed Central journal article supplement (PMC4042513)
Supplement: chest_145_6_1305_ds01.pdf [file chest_145_6_1305_ds01.pdf]

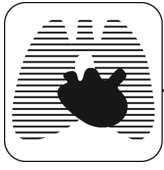

## Not All Measures of Hyperinflation Are Created Equal

### Lung Structure and Clinical Correlates of Gas Trapping and Hyperexpansion in COPD: The Multi-Ethnic Study of Atherosclerosis (MESA) COPD Study

*Benjamin M. Smith, MD; Eric A. Hoffman, PhD; Robert C. Basner, MD; Steven M. Kawut, MD; Ravi Kalhan, MD; and R. Graham Barr, MD, DrPH*

#### e-FIGURE LEGEND

**e-Figure 1. Flowchart of Participants from the EMCAP Study and Community Who Were Selected for Plethysmography in the MESA COPD Study.**

\*227 participants screened from EMCAP and 143 participants screened from the local community.

†92 participants enrolled from EMCAP and 40 participants enrolled from the local community.

Abbreviations: EMCAP denotes Emphysema and Cancer Action Project, MESA Multi-Ethnic Study of Atherosclerosis, COPD chronic obstructive pulmonary disease, CT computed tomography, and MR magnetic resonance.

*Online supplements are not copyedited prior to posting.*

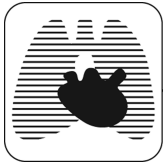

e-Figure 1.

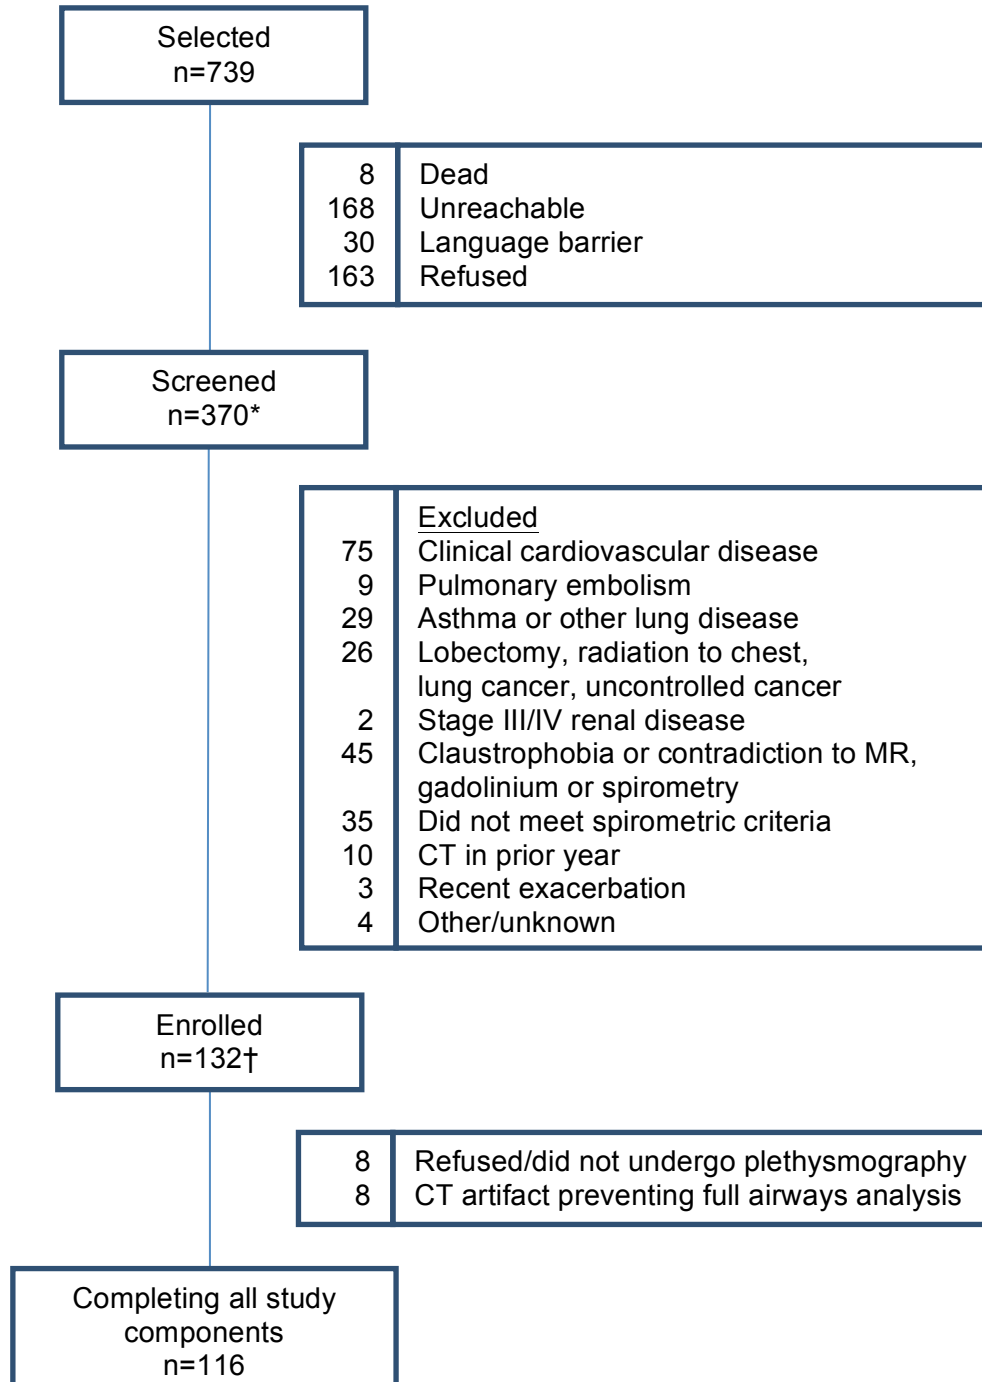

*Online supplements are not copyedited prior to posting.*

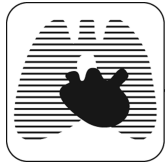

**e-Table 1. Characteristics of Participants Enrolled in the MESA COPD Study with Plethysmography and of EMCAP Participants Selected, Screened but not Enrolled.**

| <i>Characteristic</i>                                   | <i>MESA COPD Study with Plethysmography*</i><br>N=132 |                       |                        | <i>EMCAP participants screened but not enrolled</i> |
|---------------------------------------------------------|-------------------------------------------------------|-----------------------|------------------------|-----------------------------------------------------|
|                                                         | <i>Complete data</i>                                  |                       | <i>Incomplete data</i> |                                                     |
|                                                         | <i>from EMCAP</i>                                     | <i>from community</i> |                        |                                                     |
| <b>No.</b>                                              | N=86                                                  | N=30                  | N=16                   | N=135                                               |
| <b>Age – years§</b>                                     | 71±3                                                  | 62±5                  | 65±6                   | 71±4                                                |
| <b>Male sex – %</b>                                     | 44                                                    | 77                    | 44                     | 53                                                  |
| <b>Race or ethnic group – %†</b>                        |                                                       |                       |                        |                                                     |
| <b>Caucasian</b>                                        | 75                                                    | 53                    | 69                     | 81                                                  |
| <b>African American</b>                                 | 12                                                    | 47                    | 31                     | 4                                                   |
| <b>Hispanic</b>                                         | 7                                                     | 0                     | 0                      | 12                                                  |
| <b>Asian</b>                                            | 6                                                     | 0                     | 0                      | 2                                                   |
| <b>Education level – %</b>                              |                                                       |                       |                        |                                                     |
| <b>Less than high school degree</b>                     | 4                                                     | 10                    | 6                      | 5                                                   |
| <b>High school degree</b>                               | 22                                                    | 17                    | 25                     | 16                                                  |
| <b>College degree or more</b>                           | 74                                                    | 73                    | 69                     | 79                                                  |
| <b>Height – cm</b>                                      | 166±10                                                | 173±7                 | 168±5                  | 168±9                                               |
| <b>Weight – kg†</b>                                     | 77±21                                                 | 80±12                 | 80±9                   | 83±17                                               |
| <b>Body mass index – kg/m<sup>2</sup></b>               | 28±7                                                  | 27±3                  | 28±3                   | 29±5                                                |
| <b>Smoking status – %†</b>                              |                                                       |                       |                        |                                                     |
| <b>Former smoker</b>                                    | 71                                                    | 43                    | 69                     | 85                                                  |
| <b>Current smoker</b>                                   | 29                                                    | 57                    | 31                     | 15                                                  |
| <b>Pack-years of smoking – no.†</b>                     |                                                       |                       |                        |                                                     |
| <b>Median (1<sup>st</sup>, 3<sup>rd</sup> quartile)</b> | 36 (24, 52)                                           | 37 (25, 53)           | 43 (33, 54)            | 47 (29, 62)                                         |

Plus-minus values are means ± standard deviation. \*Descriptive statistics of enrolled participants weighted by the inverse ratio of probability of selection based on COPD status. †P<0.05 for pair-wise comparison between participants enrolled in the MESA COPD Study and EMCAP participants screened but not enrolled. §P<0.05 for pair-wise comparison between participants enrolled in MESA COPD Study with complete and incomplete data.

Abbreviations: MESA denotes Multi-Ethnic Study of Atherosclerosis, COPD chronic obstructive pulmonary disease, and EMCAP Emphysema and Cancer Action Project.

*Online supplements are not copyedited prior to posting.*

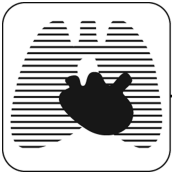

**e-Table 2. Differences in Absolute Lung Volumes and Odds of Absolute Lung Volumes being Above or Below the Limit of Normal by Airway Lumen Diameter with additional adjustment for Percent Emphysema<sub><-.950HU</sub>.**

|                                                   | <i>Predicted difference in lung volume*</i><br><i>(95% CI)</i>                             |                                 |                                   |                                   |                                  |
|---------------------------------------------------|--------------------------------------------------------------------------------------------|---------------------------------|-----------------------------------|-----------------------------------|----------------------------------|
|                                                   | <b>RV (ml)</b>                                                                             | <b>RV/TLC (%)</b>               | <b>FRC (ml)</b>                   | <b>TLC (ml)</b>                   | <b>IC/TLC (%)</b>                |
| <b>Per SD decrement in airway lumen diameters</b> | 40 ml<br>(10 to 80 ml)<br>P=0.03                                                           | 0.6%<br>(0.1 to 1.1%)<br>P=0.02 | 10 ml<br>(-20 to 40 ml)<br>P=0.58 | 20 ml<br>(-20 to 60 ml)<br>P=0.40 | 0.0%<br>(-0.5 to 0.5%)<br>P=0.91 |
|                                                   | <i>Odds ratios for lung volumes above or below the limit of normal†</i><br><i>(95% CI)</i> |                                 |                                   |                                   |                                  |
|                                                   | <b>RV &gt; ULN</b>                                                                         | <b>RV/TLC &gt; ULN</b>          | <b>FRC &gt; ULN</b>               | <b>TLC &gt; ULN</b>               | <b>IC/TLC &lt; LLN</b>           |
| <b>Per SD decrement in airway lumen diameters</b> | 1.3<br>(1.2 to 1.5)<br>P<0.001                                                             | 1.3<br>(1.1 to 1.5)<br>P=0.007  | 0.8<br>(0.6 to 1.1)<br>P=0.16     | 1.1<br>(0.8 to 1.6)<br>P=0.41     | 1.1<br>(0.8 to 1.4)<br>P=0.55    |

Predicted mean differences for the linear term and odds for the dichotomous term were estimated using generalized estimating equations. \*Predicted mean differences in lung volumes were adjusted for age, gender, height, weight, body mass index, race or ethnic group, level of education attained, current smoking status, and percent emphysema<sub><-.950HU</sub>. †ULN and LLN were calculated using age, gender, and height-based reference equations, hence logistic models were unadjusted.

Abbreviations: HU denotes Hounsfield units, SD standard deviation, CI confidence interval, RV residual volume, TLC total lung capacity, FRC functional residual capacity, IC inspiratory capacity, ULN upper limit of normal, and LLN lower limit of normal.



**e-Table 3. Differences in Absolute Lung Volumes by Airway Wall Thickness and Percent Airway Wall Thickness.**

| <i>Lung structure metric</i>                             | <i>Predicted difference in lung volume<br/>(95% CI)</i> |                                   |                                    |                                    |                                  |
|----------------------------------------------------------|---------------------------------------------------------|-----------------------------------|------------------------------------|------------------------------------|----------------------------------|
|                                                          | <b>RV (ml)</b>                                          | <b>RV/TLC (%)</b>                 | <b>FRC (ml)</b>                    | <b>TLC (ml)</b>                    | <b>IC/TLC (%)</b>                |
| <b>Per SD increment in percent airway wall thickness</b> | 70 ml<br>(20 to 120 ml)<br>P=0.009                      | 0.9%<br>(0.3 to 1.7%)<br>P=0.007  | 20 ml<br>(-40 to 80 ml)<br>P=0.53  | 30 ml<br>(-40 to 100 ml)<br>P=0.44 | 0.0%<br>(-0.6 to 0.6%)<br>P=0.98 |
| <b>Per SD increment in airway wall thickness</b>         | -30 ml<br>(-60 to 10 ml)<br>P=0.11                      | -0.3%<br>(-0.8 to 0.2%)<br>P=0.28 | 60 ml<br>(-10 to 130 ml)<br>P=0.12 | -30 ml<br>(-80 to 10 ml)<br>P=0.15 | 0.1%<br>(-0.2 to 0.4%)<br>P=0.48 |

Predicted differences in lung volumes were adjusted for age, gender, height, weight, body mass index, race or ethnic group, level of education attained and current smoking status. Airway wall thickness and percent airway wall thickness were evaluated in separate models. Predicted mean differences for the linear term were estimated using generalized estimating equations. Percent airway wall thickness was calculated as the airway wall thickness divided by the total airway diameter multiplied by 100.

Abbreviations: CI denotes confidence interval, SD standard deviation, RV residual volume, TLC total lung capacity, FRC functional residual capacity, and IC inspiratory capacity.



**e-Table 4. Differences in Absolute Lung Volumes and Odds of Absolute Lung Volumes being Above or Below the Limit of Normal by Percent Emphysema<sub><.950HU</sub> with additional adjustment for Airway Lumen Diameter.**

|                                                                   | <i>Predicted difference in lung volume*</i><br>(95% CI)                            |                                  |                                      |                                      |                                     |
|-------------------------------------------------------------------|------------------------------------------------------------------------------------|----------------------------------|--------------------------------------|--------------------------------------|-------------------------------------|
|                                                                   | <b>RV (ml)</b>                                                                     | <b>RV/TLC (%)</b>                | <b>FRC (ml)</b>                      | <b>TLC (ml)</b>                      | <b>IC/TLC (%)</b>                   |
| <b>Per SD increment in percent emphysema<sub>&lt;.950HU</sub></b> | 250 ml<br>(170 to 340 ml)<br>P<0.001                                               | 3.1%<br>(1.7 to 4.5%)<br>P<0.001 | 250 ml<br>(180 to 330 ml)<br>P<0.001 | 290 ml<br>(210 to 370 ml)<br>P<0.001 | -1.4%<br>(-0.5 to -2.2%)<br>P=0.002 |
|                                                                   | <i>Odds ratio for lung volumes above or below the limit of normal†</i><br>(95% CI) |                                  |                                      |                                      |                                     |
|                                                                   | <b>RV &gt; ULN</b>                                                                 | <b>RV/TLC &gt; ULN</b>           | <b>FRC &gt; ULN</b>                  | <b>TLC &gt; ULN</b>                  | <b>IC/TLC &lt; LLN</b>              |
| <b>Per SD increment in percent emphysema<sub>&lt;.950HU</sub></b> | 2.4<br>(1.1 to 5.1)<br>P=0.02                                                      | 3.3<br>(1.8 to 6.0)<br>P<0.001   | 2.7<br>(1.5 to 4.7)<br>P<0.001       | 2.3<br>(1.3 to 3.9)<br>P=0.002       | 1.8<br>(1.0 to 3.2)<br>P=0.04       |

Predicted mean differences for the linear term and odds for the dichotomous term were estimated using generalized estimating equations. \*Predicted mean differences in lung volumes were adjusted for age, gender, height, weight, body mass index, race or ethnic group, level of education attained, current smoking status, and airway lumen diameters. †ULN and LLN were calculated using age, gender, and height-based reference equations, hence logistic models were unadjusted.

Abbreviations: HU denotes Hounsfield units, CI confidence interval, SD standard deviation, RV residual volume, TLC total lung capacity, FRC functional residual capacity, IC inspiratory capacity, ULN upper limit of normal, and LLN lower limit of normal.



**e-Table 5. Differences in Absolute Lung Volumes by Percent Predicted  $D_{LCO}/V_A$ .**

| <i>Lung structure metric</i>                                          | <i>Predicted difference in lung volume (95% CI)</i> |                                  |                                      |                                      |                                    |
|-----------------------------------------------------------------------|-----------------------------------------------------|----------------------------------|--------------------------------------|--------------------------------------|------------------------------------|
|                                                                       | <b>RV (ml)</b>                                      | <b>RV/TLC (%)</b>                | <b>FRC (ml)</b>                      | <b>TLC (ml)</b>                      | <b>IC/TLC (%)</b>                  |
| <b>Per SD decrement in percent predicted <math>D_{LCO}/V_A</math></b> | 310 ml<br>(180 to 440 ml)<br>P<0.001                | 3.2%<br>(1.4 to 5.2%)<br>P<0.001 | 310 ml<br>(170 to 460 ml)<br>P<0.001 | 370 ml<br>(210 to 540 ml)<br>P<0.001 | -1.6%<br>(-0.4 to -2.9%)<br>P=0.01 |

Predicted differences in lung volumes were adjusted for age, gender, height, weight, body mass index, race or ethnic group, level of education attained and current smoking status. Predicted mean differences for the linear term were estimated using generalized estimating equations.

Abbreviations:  $D_{LCO}/V_A$  denotes diffusing capacity of carbon monoxide in lung divided by alveolar volume, CI confidence interval, SD standard deviation, RV residual volume, TLC total lung capacity, FRC functional residual capacity, and IC inspiratory capacity.
